# Supplementary material
Source: PubMed Central journal article supplement (PMC3856788)
Supplement: 1316851110_sapp.pdf [file 1316851110_sapp.pdf]

## Supporting Information Appendix

### Divergence Island SNP (DIS) genotyping method

Single nucleotide polymorphisms reported to be fixed between M and S molecular forms were selected for genotyping from four different studies (1-4). We used Typer® AssayDesigner software (Sequenom, San Diego, CA) to devise a multiplex SNP genotype assay consisting of 15 SNPs that occur on all three chromosomes; 7 on the X, 5 on the 2L, 3 on the 3L (Fig. S1). Details of SNPs genotyped are provided in Table S1.

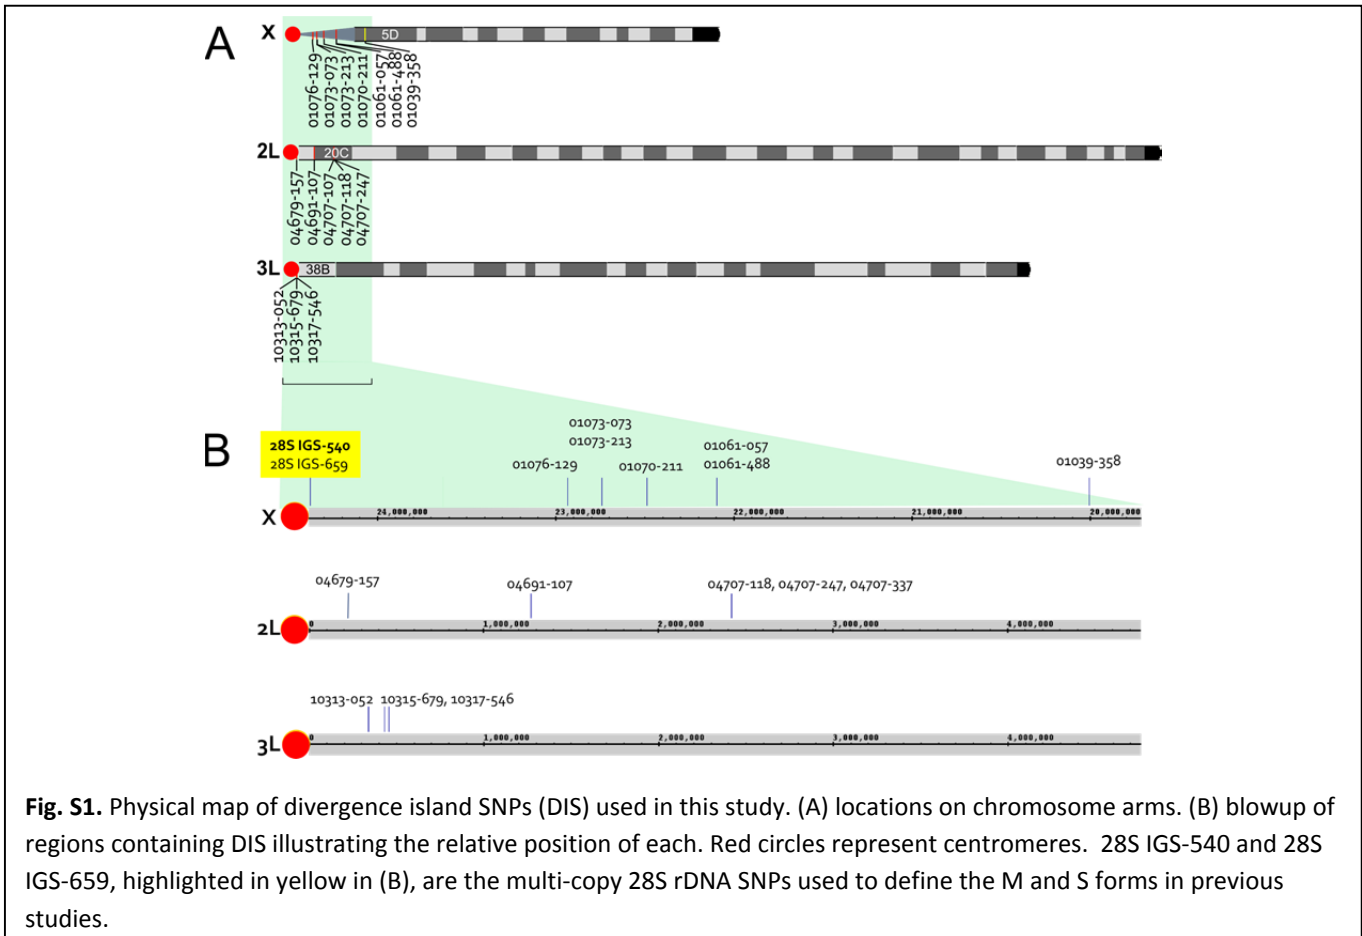

**Fig. S1.** Physical map of divergence island SNPs (DIS) used in this study. (A) locations on chromosome arms. (B) blowup of regions containing DIS illustrating the relative position of each. Red circles represent centromeres. 28S IGS-540 and 28S IGS-659, highlighted in yellow in (B), are the multi-copy 28S rDNA SNPs used to define the M and S forms in previous studies.

**Table S1.** Details of SNPs utilized for M, S and hybrid characterization.

| SNP ID    | Chromosome | Genome coordinate | M variant | S variant | reference                             |
|-----------|------------|-------------------|-----------|-----------|---------------------------------------|
| 01076-129 | X          | 22,944,682        | T         | G         | Stump et al. 2005                     |
| 01073-073 | X          | 22,750,572        | G         | T         | Stump et al. 2005                     |
| 01073-213 | X          | 22,750,432        | G         | A         | Stump et al. 2005                     |
| 01070-211 | X          | 22,497,157        | A         | G         | Turner et al. 2005                    |
| 01061-057 | X          | 22,105,860        | T         | C         | Stump et al. 2005                     |
| 01061-488 | X          | 22,10,5429        | A         | T         | Stump et al. 2005                     |
| 01039-358 | X          | 20,015,634        | C         | A         | Stump et al. 2005                     |
| 04679-157 | 2L         | 209,536           | C         | T         | White et al. 2010                     |
| 04691-107 | 2L         | 1,274,353         | A         | G         | Turner& Hahn 2007; Turner et al. 2005 |
| 04707-118 | 2L         | 2,430,786         | C         | T         | Turner et al. 2005                    |
| 04707-247 | 2L         | 2,430,915         | A         | G         | Turner et al. 2005                    |
| 04707-337 | 2L         | 2,431,005         | C         | T         | Turner et al. 2005                    |
| 10313-052 | 3L         | 296,897           | G         | A         | White et al. 2010                     |
| 10315-679 | 3L         | 387,877           | G         | A         | White et al. 2010                     |
| 10317-546 | 3L         | 413,944           | T         | C         | White et al. 2010                     |

The Sequenom iPLEX®Gold assay was used for SNP genotyping following the manufacturer's protocol (5). This genotyping method utilizes the MALDI-TOF mass spectrometry to determine genotypes based on the mass of allele-specific fragments (6-8). Mass spectrogram visualization and genotype calls were conducted using TyperAnalyzer software version 4.0 (Sequenom, San Diego, CA).

A sample of multi-locus genotypes generated by the DIS method are presented for illustration in Table S2. In Table S2, each row represents an individual mosquito sample. Each column represents a locus. Loci are grouped by linkage group (X, 2L and 3L). Homozygotes for M alleles (MM) are marked in light blue, homozygotes for S alleles (SS) are marked in dark blue, and heterozygotes (MS) are marked in yellow. Consensus molecular form is determined based on all 15 locus genotypes. We allowed up to 2 mismatched calls. Individuals that have more than 13 MM genotypes were called M form. Individuals carrying more than 13 SS genotypes were called S form. Individuals carrying more than 13 MS genotypes were called  $F_1$ . And the rest were called as backcross ( $F_{1+n}$ ). We employ the method described in Fig. S2 to illustrate the distribution of DIS genotypes among each study population, using what we refer to as “DIS maps”.

**Table S2.** A sample of multi-locus SNP genotyping results.

| Sample    | consensus molecular form | X         |           |           |           |           |           |           | 2L        |           |           |           |           | 3L        |           |           |
|-----------|--------------------------|-----------|-----------|-----------|-----------|-----------|-----------|-----------|-----------|-----------|-----------|-----------|-----------|-----------|-----------|-----------|
|           |                          | 01076-129 | 01073-213 | 01073-073 | 01070-211 | 01061-488 | 01061-057 | 01039-358 | 04679-157 | 04691-107 | 04707-118 | 04707-247 | 04707-337 | 10313-052 | 10315-679 | 10317-546 |
| 06FOUM030 | S                        | GG        | AA        | TT        | GG        | TT        | CC        | AA        | TT        | GG        | TT        | GG        | TT        | AA        | AA        | CC        |
| 06FOUM031 | S                        | GG        | AA        | TT        | GG        | TT        | CC        | AA        | TT        | GG        | TT        | GG        | TT        | AA        | AA        | CC        |
| 02KON014  | M                        | TT        | GG        | GG        | AA        | AA        | TT        | CC        | CC        | AA        | CC        | AA        | CC        | GG        | GG        | TT        |
| 02KON019  | M                        | TT        | GG        | GG        | AA        | AA        | TT        | CC        | CC        | AA        | CC        | AA        | CC        | GG        | GG        | TT        |
| 06NGAL009 | $F_1$                    | GT        | AG        | TG        | GA        | TA        | CT        | AC        | TC        | GA        | TC        | GA        | TC        | AG        | AG        | CT        |
| 06NGAL020 | $F_1$                    | GT        | AG        | TG        | GA        | TA        | CT        | AC        | TC        | GA        | TC        | GA        | TC        | AG        | AG        | CT        |
| 03Tiko044 | $F_{1+n}$                | GG        | AA        | TT        | GG        | TT        | CC        | AA        | TC        | GA        | TC        | GA        | TC        | AA        | AA        | CC        |
| 03Tiko039 | $F_{1+n}$                | GG        | AA        | TT        | GG        | TT        | CC        | AA        | TT        | GG        | TT        | GG        | TT        | AG        | AG        | CT        |
| 09ABU007  | $F_1$                    | GT        | AG        | TG        | GA        | TA        | CT        | AA        | TC        | GA        | TC        | GA        | TC        | AG        | AG        | CT        |
| 09ABU008  | $F_{1+n}$                | GG        | AA        | TT        | GG        | TT        | CC        | AA        | CC        | AA        | CC        | AA        | CC        | AA        | AA        | CC        |
| 09ABU019  | $F_{1+n}$                | GG        | AA        | TT        | GG        | TT        | CC        | AA        | TT        | GG        | TC        | GA        | TC        | GG        | GG        | TT        |

**Fig. S2.** Construction of DIS maps to describe the distribution of SNP genotypes among individuals within populations. (A) Individual multi-locus genotypes at each of the 15 loci are arranged in rows, individual loci in columns. Genotypes are organized by linkage groups, X chromosome, chromosome 2 and 3. Each genotype is color-coded, light blue for M form associated genotypes, dark blue for S and yellow for heterozygotes. (B) Each row is compressed into a series of 3 bars, each representing a linkage group. (C) Each bar is further compressed resulting in a thin line and lines are stacked into a series of rectangles facilitating visualization of the population with respect to the distribution of genotypes at the 15 SNPs.

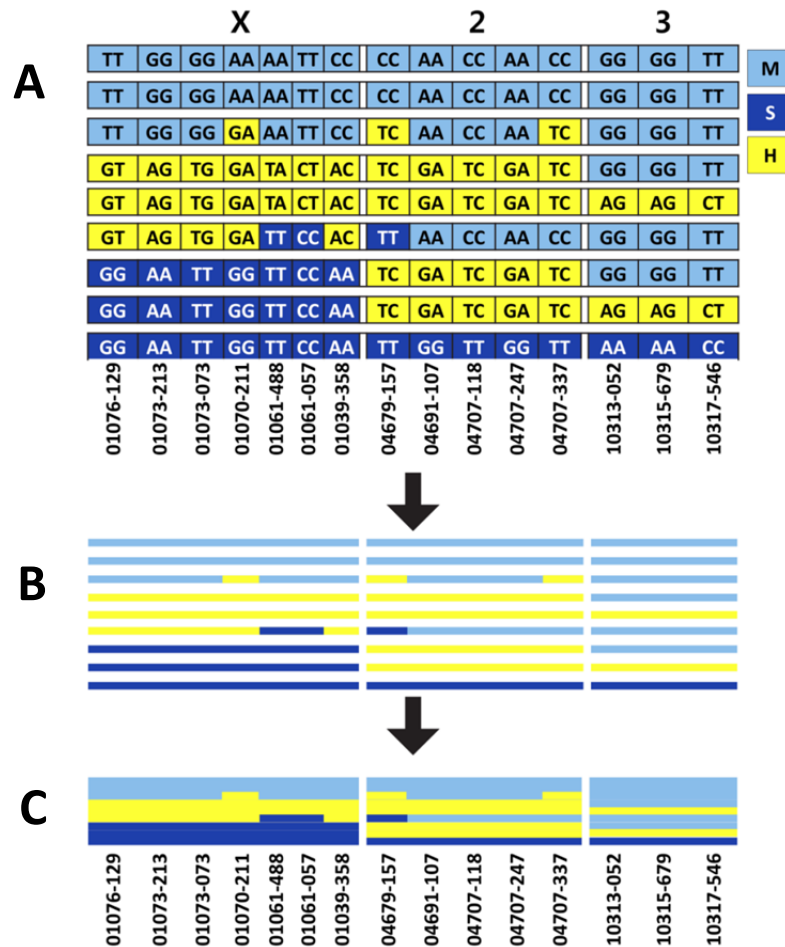

### DIS maps for national populations

Analysis of DIS genotypes identified 5 classes of populations: (1) allopatric populations of the M and S forms (Fig. S3), (2) sympatric M and S populations with past introgression and no ongoing gene flow (Fig. S4), (3) populations with past introgression and loss of divergence on 2L (Fig. S5), (4) populations with ongoing gene flow and introgression (Fig. S6) and (5) populations with complete or nearly complete introgression (Fig. S7).

Collection site information is provided in Table S3. Summary of linkage disequilibrium (LD) results is provided in Table S4.

**Fig. S3.** Divergence Islands SNP (DIS) maps for allopatric populations of the M and S forms. Populations at the villages of (A) Kondi and (B) Takouti Mali were composed of M form individuals. Populations in (C) Foubot, Cameroon and (D) Damboucoya, Senegal were made up exclusively of S form individuals and (E) Tinko, Mali consisted of 97% S form individuals.

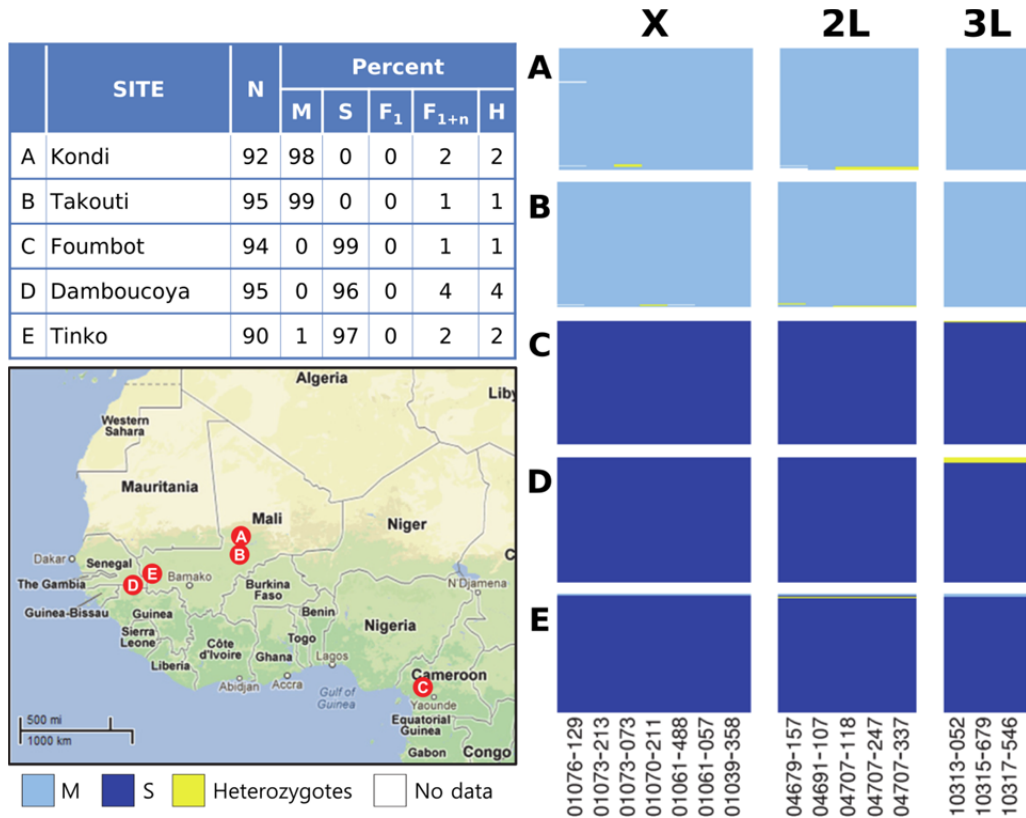

**Fig. S4.** DIS maps for sympatric M and S form populations with evidence for recent past introgression without evidence of ongoing hybridization (absence of F1 hybrids). These include populations at: (A) Banambani and (B) Founia in Mali, (C) Tiko, Cameroon, (D) Nathia, Senegal and (E) Canjufa, Guinea Bissau.

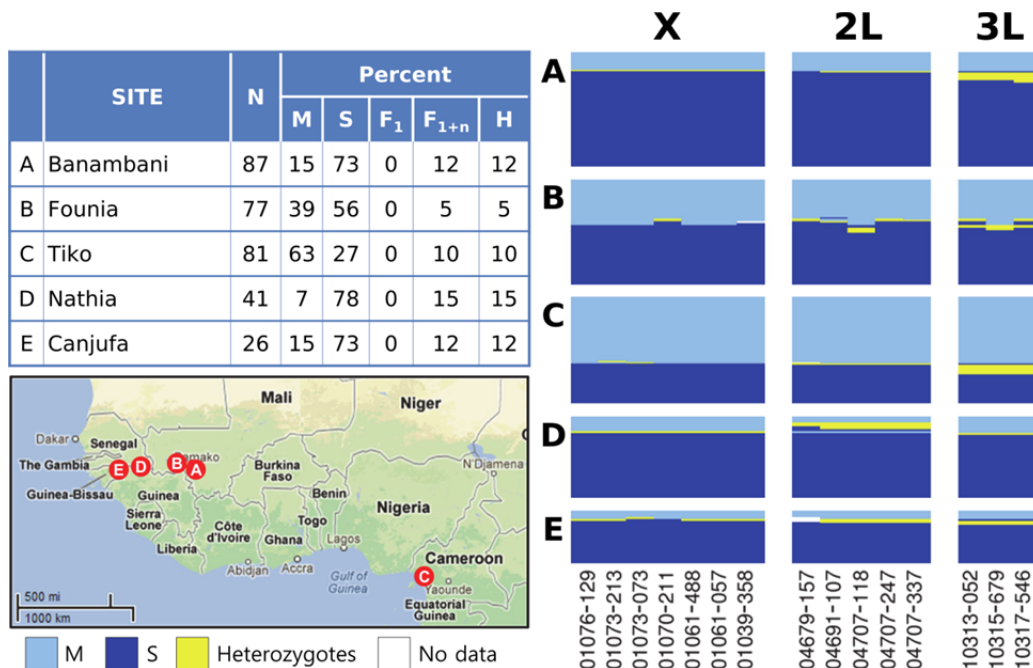

**Fig. S5.** DIS maps for sympatric M and S form populations with the loss of divergence at loci within the chromosome 2 island and no evidence of ongoing hybridization (no F1 genotypes, e.g. individuals that are simultaneously heterozygous for all ten SNPs on chromosome 3 and the X). These include the population at (A) Bioko, Equatorial Guinea and (B) Selinkenyi, Mali collected in 2012.

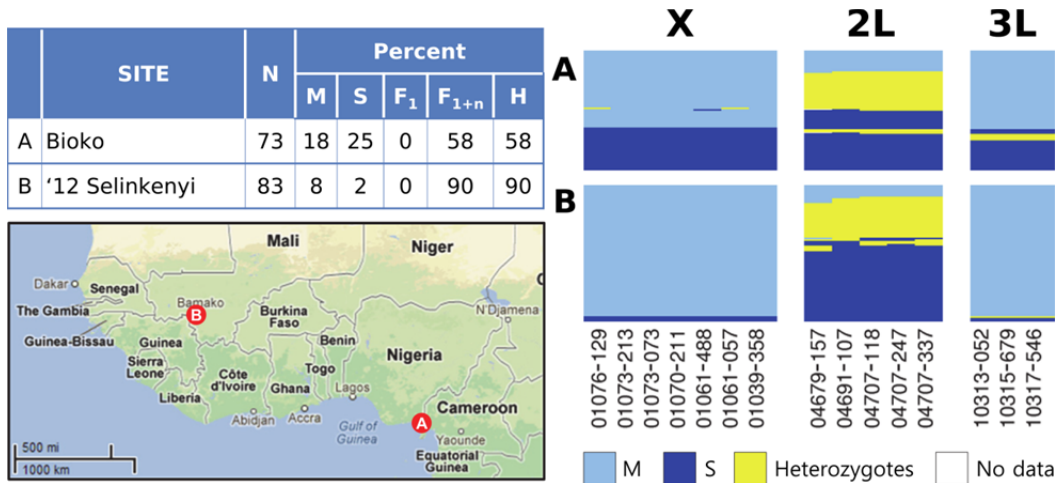

**Fig. S6.** DIS maps for sympatric M and S form populations with evidence of ongoing hybridization (presence of F1 genotypes) and introgression. Includes populations at (A) Bantingougou, Mali, (B) Njigalap, Cameroon and (C) the ENDO population from the villages of Goundry (and surrounding locations, as described in Riehle et al. 2011), Burkina Faso.

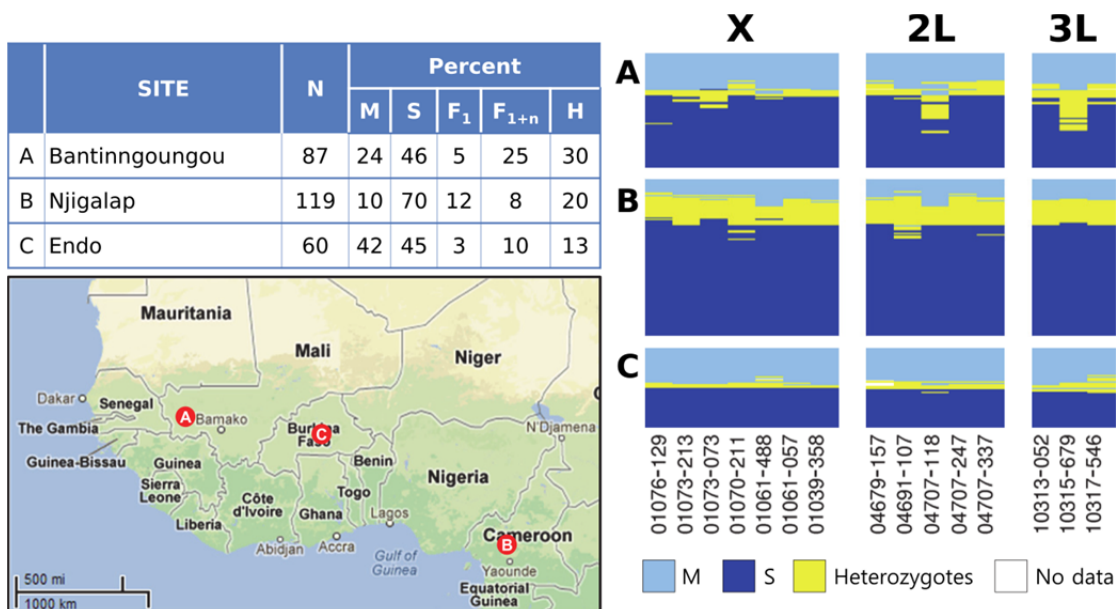

**Fig. S7.** DIS maps for sympatric M and S form populations with evidence of complete or nearly complete introgression. Includes populations at (A&C) females and males respectively from Abu, Guinea Bissau, (B&D) females and males respectively from Prabis, Guinea Bissau and (E) the GOUNDRY population from the villages of Goundry, Ouagadougou, Koupela, Kodougou and Soumousso, Burkina Faso.

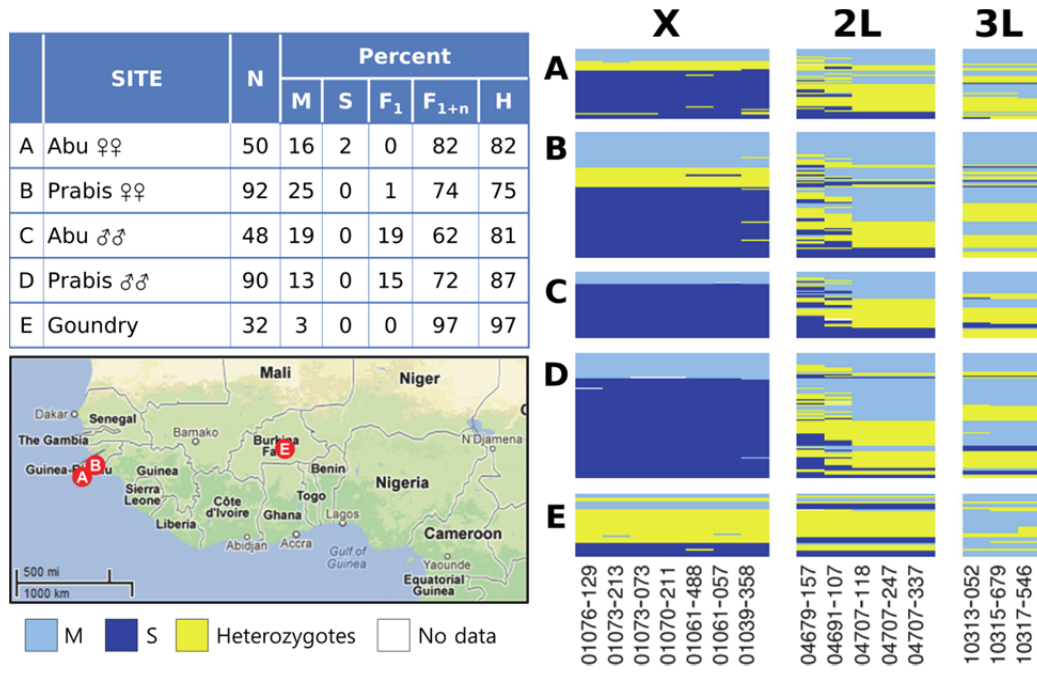

**Table S3.** Collection site information. M, S, F<sub>1</sub> and backcross frequencies are based on DIS assay result.

| Site (collection) | Country           | Latitude | Longitude | Collection Date | <i>A. gambiae</i> | %M | %S | %F <sub>1</sub> | %backcross |
|-------------------|-------------------|----------|-----------|-----------------|-------------------|----|----|-----------------|------------|
| Endo              | Burkina-Faso      | 12.5     | -1.33333  | Nov. 2006       | 60                | 42 | 45 | 3               | 10         |
| Goundry           | Burkina-Faso      | 12.5     | -1.33333  | Nov. 2006       | 32                | 3  | 0  | 0               | 97         |
| Foumbot           | Cameroon          | 5.48505  | 10.60005  | Aug. 2006       | 94                | 0  | 99 | 0               | 1          |
| Njigalap          | Cameroon          | 5.8999   | 11.13387  | Sep. 2006       | 119               | 10 | 70 | 12              | 8          |
| Tiko              | Cameroon          | 4.07860  | 9.36810   | Sep.-Oct. 2003  | 81                | 63 | 27 | 0               | 10         |
| Bioko             | Equatorial Guinea | 3.75000  | 8.78333   | Sep. 2002       | 73                | 18 | 25 | 0               | 58         |
| Abu (♀♀)          | Guinea-Bissau     | 11.46144 | -15.91411 | Nov. 2009       | 50                | 16 | 2  | 0               | 82         |
| Abu (♂♂)          |                   |          |           | Nov. 2009       | 48                | 19 | 0  | 19              | 62         |
| Canjufa           | Guinea-Bissau     | 12.43189 | -14.12662 | Nov. 2009       | 26                | 15 | 73 | 0               | 12         |
| Prabis (♀♀)       | Guinea-Bissau     | 11.80066 | -15.74332 | Nov. 2009       | 92                | 25 | 0  | 1               | 74         |
| Prabis (♂♂)       |                   |          |           | Nov. 2009       | 90                | 13 | 0  | 15              | 72         |
| Banambani         | Mali              | 12.80000 | -8.05000  | July, 2005      | 87                | 15 | 73 | 0               | 12         |
| Bantinngougou     | Mali              | 13.69735 | -10.87117 | Aug., 2006      | 87                | 24 | 46 | 5               | 25         |
| Founia            | Mali              | 12.89163 | -9.46063  | Oct. 2006       | 77                | 39 | 56 | 0               | 5          |
| Kondi             | Mali              | 16.36670 | -3.38330  | Oct.-Nov. 2002  | 92                | 98 | 0  | 0               | 2          |
| Selinkenyi        | Mali              | 11.70000 | -8.28333  | July, 1991      | 79                | 90 | 6  | 0               | 4          |
|                   |                   |          |           | July, 1996      | 92                | 74 | 23 | 0               | 3          |
|                   |                   |          |           | Aug., 2002      | 120               | 67 | 22 | 1               | 11         |
|                   |                   |          |           | Sep. 2004       | 107               | 60 | 35 | 0               | 5          |
|                   |                   |          |           | Aug., 2006      | 124               | 36 | 34 | 12              | 18         |
|                   |                   |          |           | Sep. 2010       | 51                | 6  | 39 | 0               | 55         |
|                   |                   |          |           | Sep. 2011       | 78                | 9  | 5  | 0               | 86         |
|                   |                   |          |           | Aug.-Sep. 2012  | 83                | 8  | 2  | 0               | 90         |
| Takouti           | Mali              | 15.46067 | -3.49467  | Sep. 2005       | 95                | 99 | 0  | 0               | 1          |
| Tinko             | Mali              | 13.49600 | -10.75520 | Aug., 2005      | 90                | 1  | 97 | 0               | 2          |
| Damboucoya        | Senegal           | 12.50707 | -12.41138 | Oct. 2009       | 95                | 0  | 96 | 0               | 4          |
| Nathia            | Senegal           | 12.50089 | -12.34388 | Oct. 2009       | 41                | 7  | 78 | 0               | 15         |

**Table S4.** Summary of linkage disequilibrium (LD) result. Strong LD ( $r_2 > 0.5$ ) is indicated in gray font.

| Site (collection)                                                                      | Within X island | Within 2L island | Within 3L island | Between X and 2L | Between X and 3L | Between 2L and 3L |
|----------------------------------------------------------------------------------------|-----------------|------------------|------------------|------------------|------------------|-------------------|
| <b><i>Populations with recent past introgression and no ongoing gene flow.</i></b>     |                 |                  |                  |                  |                  |                   |
| Banambani                                                                              | 1.000           | 0.984            | 0.954            | 0.926            | 0.739            | 0.744             |
| Founia                                                                                 | 0.941           | 0.857            | 0.850            | 0.864            | 0.831            | 0.837             |
| Tiko                                                                                   | 0.985           | 1.000            | 1.000            | 0.967            | 0.820            | 0.799             |
| Nathia                                                                                 | 1.000           | 0.959            | 1.000            | <b>0.533</b>     | 0.856            | 0.580             |
| Canjufa                                                                                | 0.901           | 1.000            | 1.000            | 0.864            | 0.669            | 0.781             |
| <b><i>Populations with recent past introgression and loss of divergence on 2L.</i></b> |                 |                  |                  |                  |                  |                   |
| Bioko                                                                                  | 0.986           | 0.971            | 1.000            | 0.233            | 0.824            | 0.184             |
| '12 Selinkenyei                                                                        | 1.000           | 0.818            | 1.000            | <b>0.013</b>     | 0.828            | <b>0.011</b>      |
| <b><i>Populations with ongoing gene flow and introgression.</i></b>                    |                 |                  |                  |                  |                  |                   |
| Bantinnougou                                                                           | 0.849           | 0.747            | 0.699            | 0.784            | 0.710            | 0.685             |
| Njigalap                                                                               | 0.817           | 0.805            | 0.951            | 0.816            | 0.877            | 0.863             |
| Endo                                                                                   | 0.947           | 0.967            | 0.854            | 0.895            | 0.793            | 0.797             |
| <b><i>Populations with complete or nearly complete introgression.</i></b>              |                 |                  |                  |                  |                  |                   |
| Goundry                                                                                | 0.948           | 0.981            | 0.604            | <b>0.001</b>     | <b>0.048</b>     | <b>0.051</b>      |
| Abu                                                                                    | 0.882           | 0.634            | 0.898            | <b>0.132</b>     | <b>0.104</b>     | <b>0.067</b>      |
| Prabis                                                                                 | 0.963           | 0.572            | 1.000            | <b>0.107</b>     | <b>0.047</b>     | <b>0.046</b>      |
| <b><i>Temporal Variation in Hybridization at Selinkenyei, Mali</i></b>                 |                 |                  |                  |                  |                  |                   |
| 1991                                                                                   | 0.979           | 0.877            | 1.000            | 0.933            | 0.776            | 0.736             |
| 1996                                                                                   | 1.000           | 0.959            | 1.000            | 0.964            | 0.973            | 0.938             |
| 2002                                                                                   | 0.895           | 0.896            | 0.929            | 0.869            | 0.791            | 0.756             |
| 2004                                                                                   | 1.000           | 0.977            | 0.987            | 0.957            | 0.917            | 0.876             |
| 2006                                                                                   | 0.805           | 0.780            | 0.865            | 0.761            | 0.819            | 0.800             |
| 2010                                                                                   | 0.978           | 0.927            | 1.000            | <b>0.236</b>     | 0.879            | <b>0.207</b>      |
| 2011                                                                                   | 0.895           | 0.761            | 1.000            | <b>0.023</b>     | 0.936            | <b>0.022</b>      |
| 2012                                                                                   | 1.000           | 0.818            | 1.000            | <b>0.013</b>     | 0.828            | <b>0.011</b>      |

## References.

1. Stump AD, *et al.* (2005) Centromere-proximal differentiation and speciation in *Anopheles gambiae*. *Proc Natl Acad Sci U S A* 102(44):15930-15935.
2. Turner TL & Hahn MW (2007) Locus- and population-specific selection and differentiation between incipient species of *Anopheles gambiae*. *Mol Biol Evol* 24(9):2132-2138.
3. Turner TL, Hahn MW, & Nuzhdin SV (2005) Genomic islands of speciation in *Anopheles gambiae*. *PLoS Biol* 3(9):e285.
4. White BJ, Cheng C, Simard F, Costantini C, & Besansky NJ (2010) Genetic association of physically unlinked islands of genomic divergence in incipient species of *Anopheles gambiae*. *Mol Ecol* 19(5):925-939.
5. Jurinke C, van den Boom D, Cantor CR, & Koster H (2002) Automated genotyping using the DNA MassArray technology. *Methods Mol Biol* 187:179-192.
6. Fu JF, *et al.* (2008) MassARRAY assay: a more accurate method for JAK2V617F mutation detection in Chinese patients with myeloproliferative disorders. *Leukemia* 22(3):660-663.
7. Wright WT, *et al.* (2008) Multiplex MassARRAY spectrometry (iPLEX) produces a fast and economical test for 56 familial hypercholesterolaemia-causing mutations. *Clin Genet* 74(5):463-468.
8. Zhang SJ, Qiu HX, Li JY, Shi JY, & Xu W (2010) The analysis of JAK2 and MPL mutations and JAK2 single nucleotide polymorphisms in MPN patients by MassARRAY assay. *Int J Lab Hematol* 32(4):381-386.
